# Supplementary material
Source: publisher figshare collection journal article supplement (https://acs.figshare.com/ndownloader/files/12403505)
Supplement: Supplementary file 1 [file 12403505]

# **Simultaneous Scheduling and Routing of Pipeless Plants in Different Layouts**

*Munawar A. Shaik\* and Pulkrit Mathur*

*Department of Chemical Engineering, Indian Institute of Technology Delhi, Hauz Khas, New  
Delhi 110 016, India*

### Supporting Information:

The Gantt charts of example 1 for linear and circular layouts are given in Figures S1 to S4.

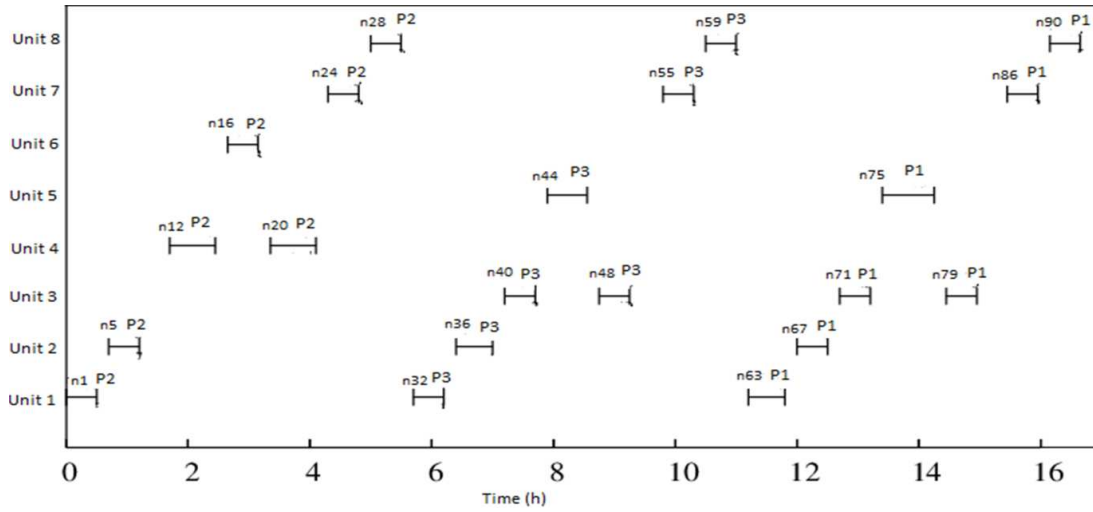

**Figure S1.** Gantt chart for single vessel case in linear layout (example 1)

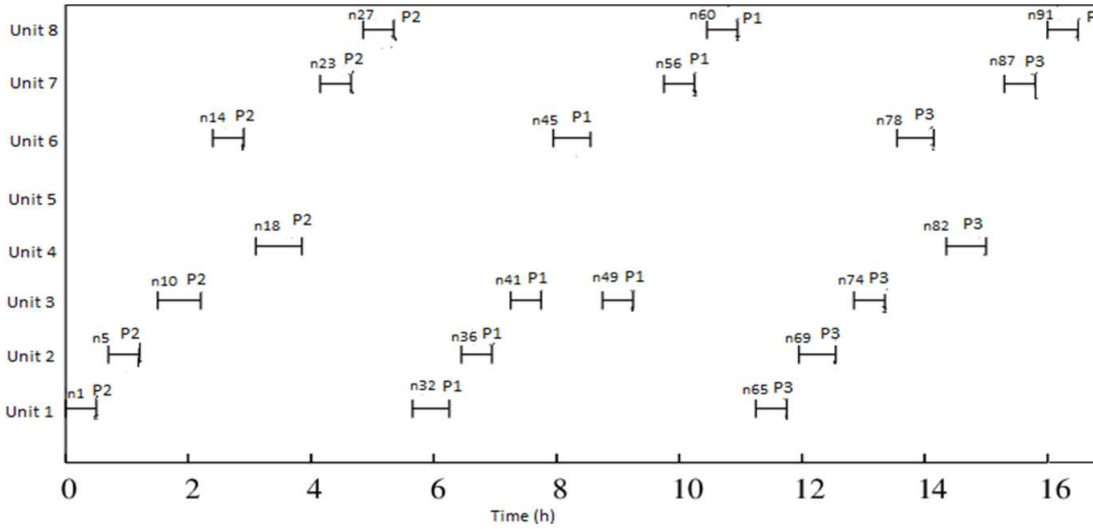

**Figure S2.** Gantt chart for single vessel case in circular layout (example 1)

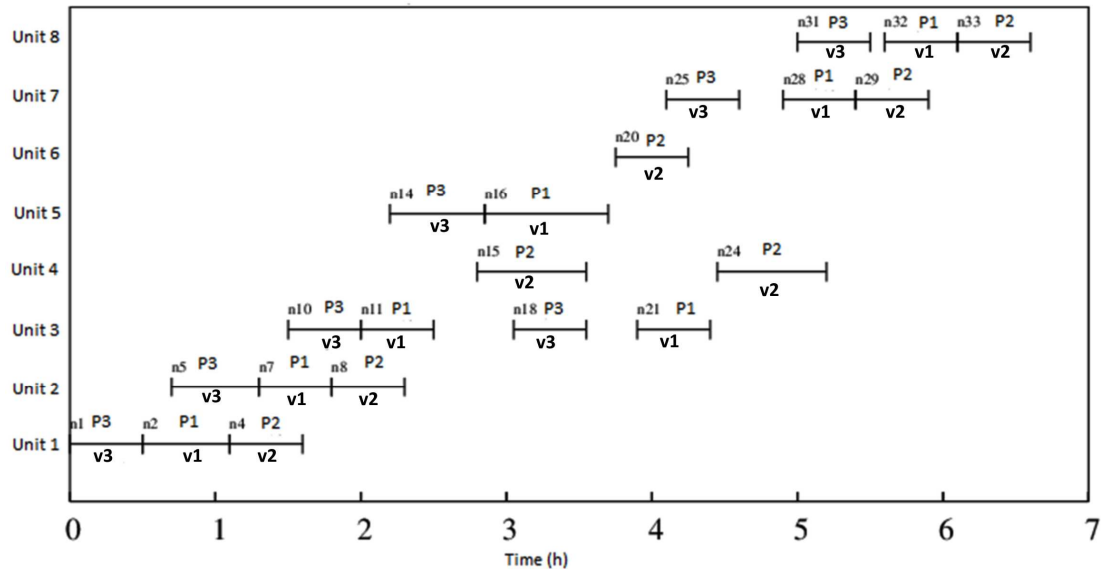

**Figure S3.** Gantt chart for three vessel case in linear layout (example 1)

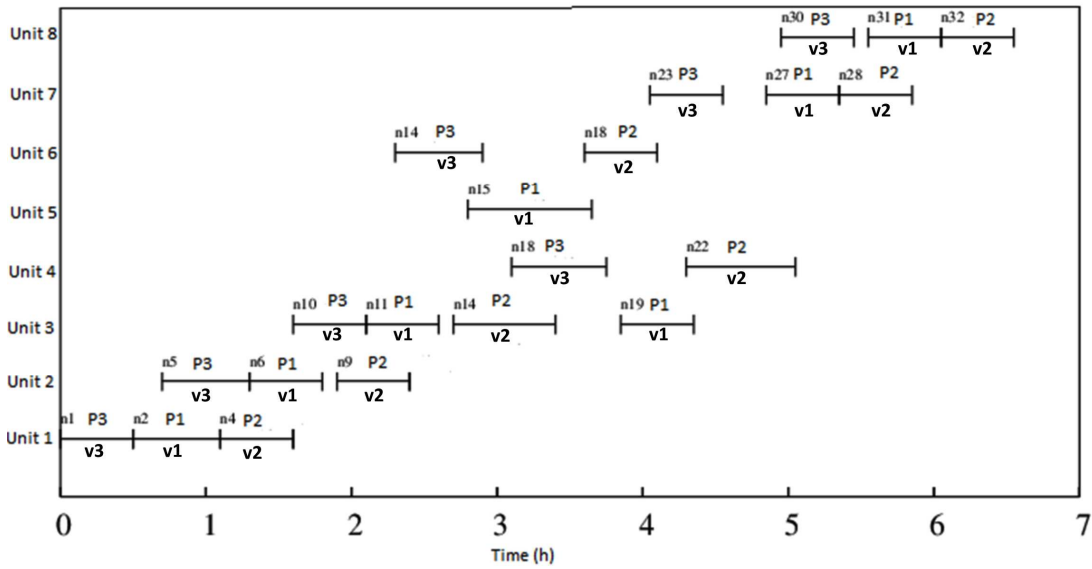

**Figure S4.** Gantt chart for three vessel case in circular layout (example 1)
